# Supplementary material for: Electrochemical preparation of Pd nanorods with high-index facets
Source: Royal Society of Chemistry journal article supplement (doi:10.1039/b819751b), 2009-01-01
Supplement: b819751b.pdf [file b819751b.pdf]

## Supplementary Information

### Electrochemical Preparation of Pd Nanorods with high-index facets

Na Tian, Zhi-You Zhou, Shi-Gang Sun\*

State Key Laboratory of Physical Chemistry of Solid Surfaces, Department of Chemistry,  
College of Chemistry and Chemical Engineering, Xiamen University, Xiamen 361005, China

#### 1. Shapes of the end of fivefold twinned nanorod bounded by different facets

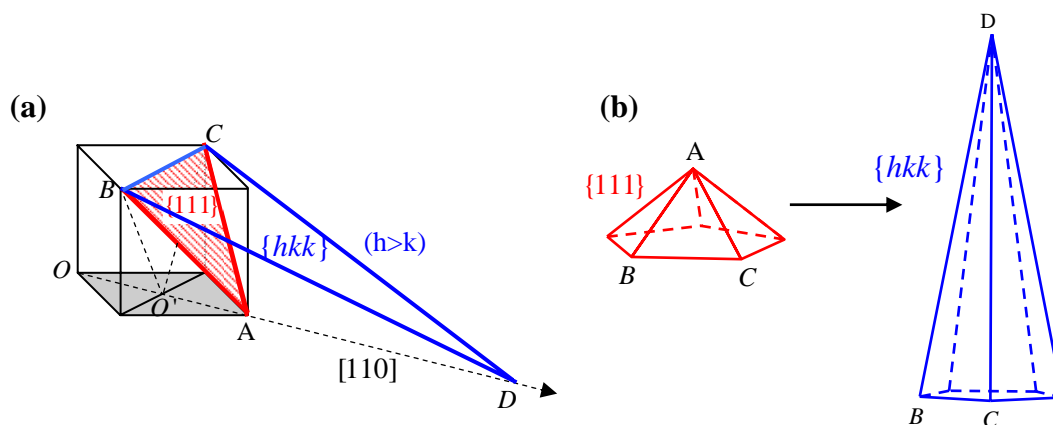

**Fig. S1** (a) Relative positions of  $\{111\}$  facet ( $\triangle ABC$ ) and  $\{hkk\}$  facet ( $\triangle BCD$ ) in cubic lattice; (b) Schematic illustration of the end of fivefold twinned nanorod changing from pentagonal pyramid into elongated pentagonal pyramid when its surfaces are transformed from  $\{111\}$  into  $\{hkk\}$ .

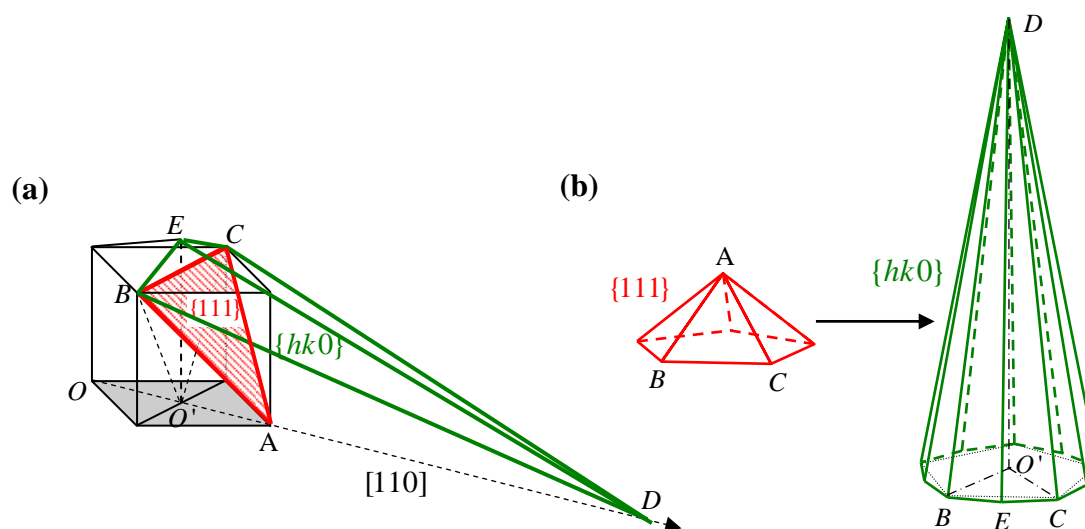

**Fig. S2** (a) Relative positions of  $\{111\}$  facet ( $\triangle ABC$ ) and  $\{hk0\}$  facets ( $\triangle BDE$  and  $\triangle CDE$ ) in cubic lattice; (b) Schematic illustration of the end of fivefold twinned nanorod changing from pentagonal pyramid into decagonal pyramid when its surfaces are transformed from  $\{111\}$  into  $\{hk0\}$ .

## 2. Miller indices of the surfaces on fivefold twinned Pd nanorods

The Miller index of the end surfaces of fivefold twinned nanorod can be determined by measuring the geometric parameters of the end of nanorod. One is the ratio of height to edge length (H/L), and the other is the ratio of height to base width (H/W), as listed in Table 1. By measuring geometric parameters of tens of the synthesized Pd nanorods, we have determined that the surfaces of type-I Pd nanorods ranges from {10, 1, 1} to {15, 1, 1} facets (H/L: 5 ~ 7.4), and the surfaces of type-II Pd nanorods varies from {310} to {610} facets (H/W: 2.2 ~ 4.1). Fig. S3 shows the models of surface atomic arrangement of Pd(11, 1, 1) and Pd(410) surfaces. Atoms labeled with green and magenta colors are step atoms with a coordination number of 7 and 6, respectively.

**Table S1** Relationship between geometric parameters and Miller indices of nanorod tip.

| Shape          | Pentagonal pyramid          | Elongated pentagonal pyramid            | Decagonal pyramid                                                                    |
|----------------|-----------------------------|-----------------------------------------|--------------------------------------------------------------------------------------|
| Miller indices | {111}                       | {hkk}                                   | {hk0}                                                                                |
| H/W            | $\frac{1}{4 \sin 54^\circ}$ | $\frac{1}{4 \sin 54^\circ} \frac{h}{k}$ | $(1 + \frac{2h}{k}) / (\sqrt{12} \cos 18^\circ)$                                     |
| H/L            | $\frac{1}{2}$               | $\frac{h}{2k}$                          |  |

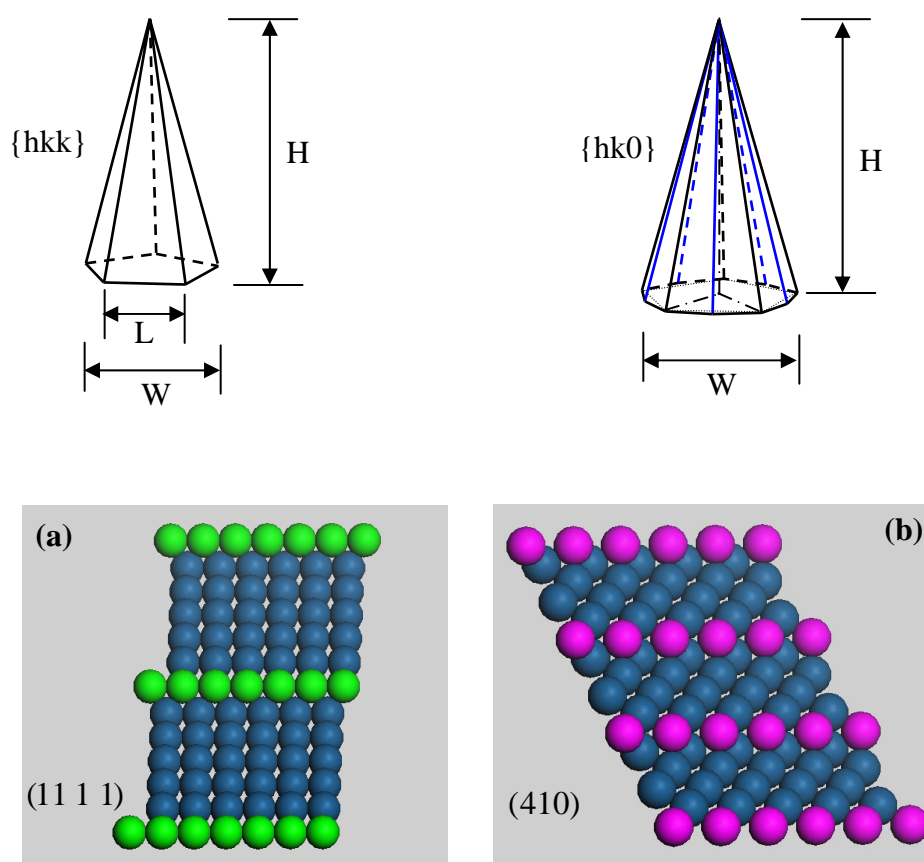

**Fig. S3** Models of surface atomic arrangement of Pd(11, 1, 1) and Pd(410).

### 3. Onset potential of the formation of Pd surface oxide

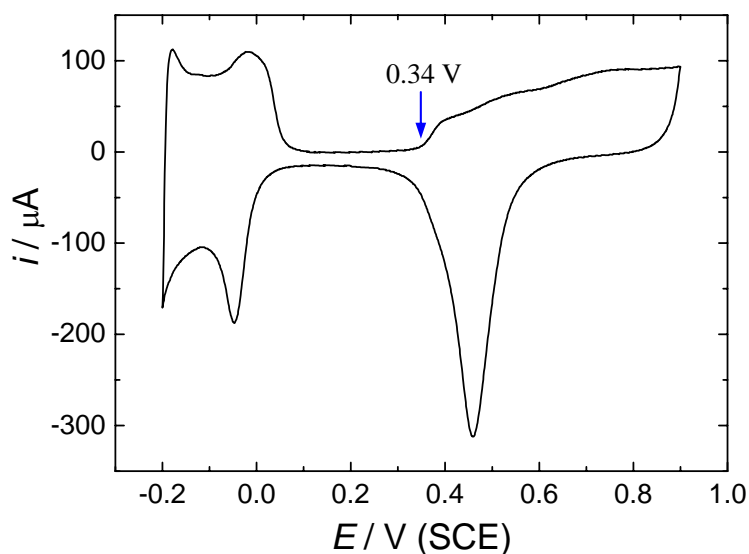

**Fig. S4** Cyclic voltammograms of type-I Pd nanorods supported on GC substrate in 0.1 M HClO<sub>4</sub> solution. Scan rate: 50 mV s<sup>-1</sup>.

The onset potential of the formation of Pd surface oxide is measured about 0.34 V.

### 4. Discussion of the formation of broken end on type-I Pd nanorods

The type I Pd nanorods had a broken end while the type-II Pd nanorods did not. This may be caused by crystal defects. During the preparation of Pd nanorods, at the lower potential ( $E_L$ ), Pd nanocrystals can grow through the reduction of Pd<sup>2+</sup> ions; at the upper potential ( $E_U$ ), Pd surfaces can be oxidized and the slight dissolution of Pd may occur if potential is higher than ~ 0.70 V according to the results reported by Woods.<sup>1</sup> The  $E_L$  for growth of type-I nanorods is very low (-0.15 V) and Pd nanocrystals grow fast, which may introduce some crystal defects into the nanorods. These defects may lead to incompletely enclosed end for the five sub-crystals, and form the “broken end”. The  $E_L$  for type-II nanorods is relatively high (0.15 V), so the growth rate is relatively slow. More importantly, the  $E_U$  is as high as 0.85 V, where the dissolution of Pd is obvious. The crystal defects formed at  $E_L$  may be dissolved preferentially due to their high energy. So, the type-I nanorods prepared at  $E_L$ =-0.15 V,  $E_U$ =0.65 V had a broken end, while the type-II nanorods prepared at  $E_L$ =0.15 V,  $E_U$ =0.85 V were enclosed completely.

## 5. Measurement of electroactive surface area of Pd catalysts

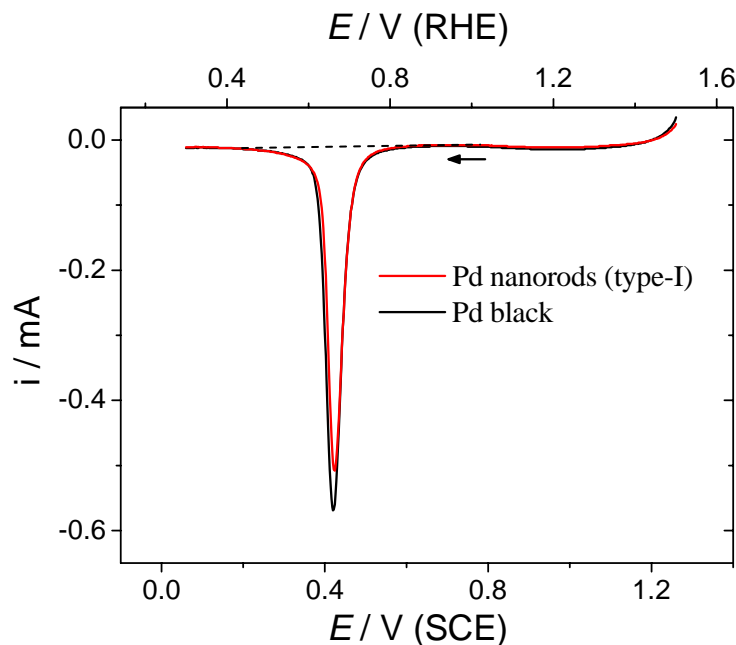

**Fig. S5** Cathodic voltammograms of type-I Pd nanorods (red line) and commercial Pd black catalysts (black line) after holding at 1.26 V *vs.* SCE (or 1.50 V *vs.* RHE) for 10 s. The cathodic peak at about 0.42 V (SCE) is the reduction of Pd surface oxide. 1 M H<sub>2</sub>SO<sub>4</sub> solution; scan rate: 20 mV s<sup>-1</sup>.

The electroactive surface area of Pd was calculated according to the method proposed by Woods.<sup>2</sup> At the potential about 1.50 V (RHE), monolayer Pd oxide would form on the Pd surfaces. With the assumption of 424  $\mu\text{C cm}^{-2}$  for the reduction of this Pd oxide, the electroactive surface area of Pd can be calculated. In Fig. S5, the reduction charge of Pd surface oxide is integrated to be 1368  $\mu\text{C}$  and 1572  $\mu\text{C}$  for Pd nanorods and commercial Pd black, respectively. So the corresponding electroactive surface area is 3.23 cm<sup>2</sup> and 3.71 cm<sup>2</sup>, respectively. Note that to avoid disturbing the surface structure of Pd nanorods, the measurement of electroactive surface area was carried out after the measurement of ethanol electrooxidation.

## 6. Catalytic activity of type-II Pd nanorods and nanoparticles

As can be seen in the Fig. 2, the type-II Pd nanorods and irregular faceted nanoparticles coexist on the GC surface. It is difficult to evaluate the intrinsic catalytic activity of type-II Pd nanorods, since their distribution density is very low and the contribution of nanoparticles can not be neglected. We have tested the catalytic activity of the sample with type-II Pd nanorods and nanoparticles (red line), which is 3~5 times higher than that of commercial Pd black catalyst (black line), as illustrated in Fig. S6. Therefore, the preparation of Pd catalysts with {hk0} facets is a promising method to improve the catalytic activity.

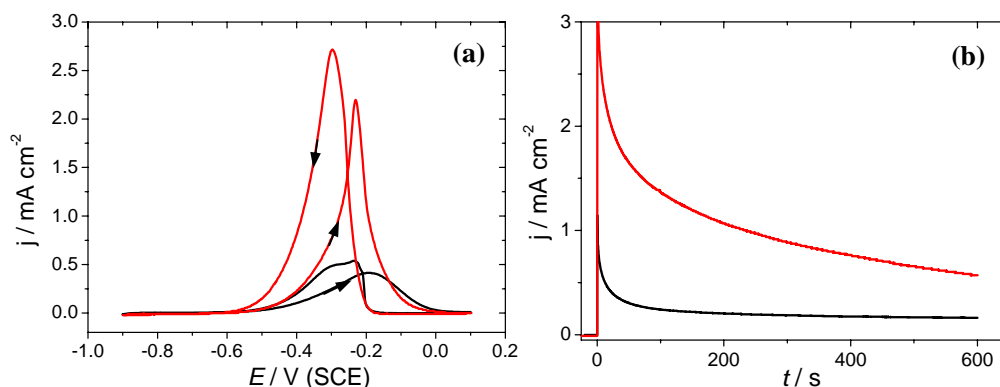

**Fig. S6** (a) Cyclic voltammograms ( $10 \text{ mV s}^{-1}$ ) and (b) Current ~ time ( $E = -0.30 \text{ V}$ ) curves of ethanol oxidation on type-II Pd nanorods + nanoparticles (red line) and commercial Pd black catalyst (black line) in  $0.1 \text{ M}$  ethanol +  $0.1 \text{ M}$  NaOH solution.

- 1 D. A. J. Rand, R. Woods, *J. Electroanal. Chem.* 1972, **35**, 209.
- 2 D. A. J. Rand, R. Woods, *J. Electroanal. Chem.*, 1971, **31**: 29.
